# Supplementary material
Source: HighWire-hosted journal article supplement (http://www.annfammed.org/highwire/filestream/7866/field_highwire_adjunct_files/0/Daaleman_Appendix.pdf)
Supplement: Daaleman_Appendix.pdf [file Daaleman_Appendix.pdf]

Online Supplementary Material

Daaleman TP, Frey BB. The spirituality index of well-being: a new instrument for health-related quality-of-life research. *Ann Fam Med*. 2004;2:499-503.

<http://www.annfammed.org/cgi/content/full/2/5/499/DC1>

**Appendix 1. Spirituality Index of Well-Being**

*Which statement best describes your feelings and choices?*

| Strongly Agree                                                      | Agree | Neither Agree nor Disagree | Disagree | Strongly Disagree |
|---------------------------------------------------------------------|-------|----------------------------|----------|-------------------|
| 1                                                                   | 2     | 3                          | 4        | 5                 |
| 1. There is not much I can do to help myself.                       |       |                            |          |                   |
| 1                                                                   | 2     | 3                          | 4        | 5                 |
| 2. Often, there is no way I can complete what I have started.       |       |                            |          |                   |
| 1                                                                   | 2     | 3                          | 4        | 5                 |
| 3. I can't begin to understand my problems.                         |       |                            |          |                   |
| 1                                                                   | 2     | 3                          | 4        | 5                 |
| 4. I am overwhelmed when I have personal difficulties and problems. |       |                            |          |                   |
| 1                                                                   | 2     | 3                          | 4        | 5                 |
| 5. I don't know how to begin to solve my problems.                  |       |                            |          |                   |
| 1                                                                   | 2     | 3                          | 4        | 5                 |
| 6. There is not much I can do to make a difference in my life.      |       |                            |          |                   |
| 1                                                                   | 2     | 3                          | 4        | 5                 |
| 7. I haven't found my life's purpose yet.                           |       |                            |          |                   |
| 1                                                                   | 2     | 3                          | 4        | 5                 |
| 8. I don't know who I am, where I came from, or where I am going.   |       |                            |          |                   |
| 1                                                                   | 2     | 3                          | 4        | 5                 |
| 9. I have a lack of purpose in my life.                             |       |                            |          |                   |
| 1                                                                   | 2     | 3                          | 4        | 5                 |
| 10. In this world, I don't know where I fit in.                     |       |                            |          |                   |
| 1                                                                   | 2     | 3                          | 4        | 5                 |
| 11. I am far from understanding the meaning of life.                |       |                            |          |                   |
| 1                                                                   | 2     | 3                          | 4        | 5                 |
| 12. There is a great void in my life at this time.                  |       |                            |          |                   |
| 1                                                                   | 2     | 3                          | 4        | 5                 |

Copyright 2000 The University of Kansas Medical Center.
